# Supplementary material
Source: HighWire-hosted journal article supplement (http://www.ajnr.org/highwire/filestream/93988/field_highwire_adjunct_files/0/1533.pdf)
Supplement: 1533.pdf [file 1533.pdf]

**Online Table 1. CTA acquisition parameters**

|                                      | CTA                                             |
|--------------------------------------|-------------------------------------------------|
| Scanner                              | Siemens, SOMATOM Definition AS+ and Edge        |
| Detector collimation (mm)            | 128 x 0.6                                       |
| Reconstruction slice thickness (mm)  | 1.0                                             |
| Reconstruction interval (mm)         | 0.5                                             |
| Scan phase                           | Intravenous contrast agent, 3-sec delay         |
| Table speed (mm/s)                   | 5                                               |
| Pitch                                | 1                                               |
| Rotation time (s)                    | 0.5                                             |
| Tube voltage (kV/mAs)                | 120/300                                         |
| Contrast agent                       | Iopamidol-based nonionic contrast (Pamiray370®) |
| Iodine concentration (mg/mL)         | 370                                             |
| Flow rate (mL/s)                     | 4.5                                             |
| Contrast agent volume (mL)           | 60                                              |
| Starting location                    | Aortic root                                     |
| Ending location                      | 3cm above the skull                             |
| CTDI dosimetry phantom diameter (cm) | 32                                              |
| Mean CTDI volume (mGy)               | 69.6 ± 26.5 L                                   |
| 1st quartile                         | 47 L                                            |
| Median                               | 74 L                                            |
| 3rd quartile                         | 84 L                                            |
| Mean DLP (mGy × cm)                  | 2170 ± 827.6                                    |
| 1st quartile                         | 1500                                            |
| Median                               | 2177                                            |
| 3rd quartile                         | 2652                                            |
| Soft tissue Kernel                   | B40                                             |

CTDI, computed tomography dose index; DLP, dose-length product

**Online Table 2. Cox proportional hazards model for the association of the plaque HU values with the occurrence of the MACE composite outcome and the individual MACE components among subjects with moderate CAS (n=101)**

|                                | MACE (-)    | MACE (+)    | HR (95% CI)      | <i>P</i> value |
|--------------------------------|-------------|-------------|------------------|----------------|
| MACE <sup>a</sup> (n=18)       | 39.6 ± 15.7 | 27.6 ± 8.6  | 0.95 (0.92–0.98) | .002           |
| Any stroke (n=8)               | 38.5 ± 15.3 | 25.0 ± 11.6 | 0.95 (0.90–0.99) | .01            |
| Ipsilateral stroke (n=6)       | 38.2 ± 15.4 | 25.3 ± 11.0 | 0.95 (0.90–0.99) | .04            |
| ACS (n=7)                      | 38.1 ± 15.7 | 29.6 ± 6.1  | 0.96 (0.92–1.01) | .14            |
| Cardiovascular mortality (n=8) | 38.3 ± 15.7 | 27.5 ± 6.6  | 0.95 (0.91–0.99) | .04            |
| All-cause mortality (n=23)     | 38.3 ± 15.7 | 34.8 ± 14.3 | 0.99 (0.96–1.01) | .31            |

Data are presented as means ± standard deviations of plaque HU values.

ACS, acute coronary syndrome; CAS, carotid artery stenosis; HR, hazard ratio; HU, Hounsfield unit;

MACE, major adverse cardiovascular event

<sup>a</sup>Any stroke, ACS, or cardiovascular mortality

**Online Table 3. Cox proportional hazards model for the association of the presence of spotty calcium on CTA with the occurrence of the MACE composite outcome and the individual MACE components among subjects with moderate CAS (*n*=101)**

|                                         | MACE (-)  | MACE (+) | HR (95% CI)       | <i>P</i> value |
|-----------------------------------------|-----------|----------|-------------------|----------------|
| MACE <sup>a</sup> ( <i>n</i> =18)       | 11 (13.3) | 8 (44.4) | 5.20 (1.94–13.92) | .001           |
| Any stroke ( <i>n</i> =8)               | 16 (17.2) | 3 (37.5) | 4.07 (0.91–18.31) | .07            |
| Ipsilateral stroke ( <i>n</i> =6)       | 16 (16.8) | 3 (50.0) | 5.48 (1.10–27.37) | .04            |
| ACS ( <i>n</i> =7)                      | 15 (16.0) | 4 (57.1) | 6.93 (1.52–31.58) | .01            |
| Cardiovascular mortality ( <i>n</i> =8) | 15 (16.1) | 4 (50.0) | 4.34 (1.08–17.40) | .04            |
| All-cause mortality ( <i>n</i> =23)     | 10 (12.8) | 9 (39.1) | 2.72 (1.17–6.31)  | .02            |

Data are presented as n (%) of carotid plaques with spotty calcium detected on CTA.

ACS, acute coronary syndrome; CAS, carotid artery stenosis; HR, hazard ratio; MACE, major adverse cardiovascular event

<sup>a</sup>Any stroke, ACS, or cardiovascular mortality

### Online Fig 1. Flow chart of carotid plaque inclusion

The analysis included 194 carotid plaques identified in 176 asymptomatic subjects with moderate to severe CAS, diagnosed using CTA and additional Doppler ultrasound. The associations between various demographic, clinical, and imaging features and subsequent MACE occurrence were evaluated.

CAS, carotid artery stenosis; CEA, carotid endarterectomy; MACE, major adverse cardiovascular event

<sup>a</sup>Subjects with recent cardiovascular events within 6 months

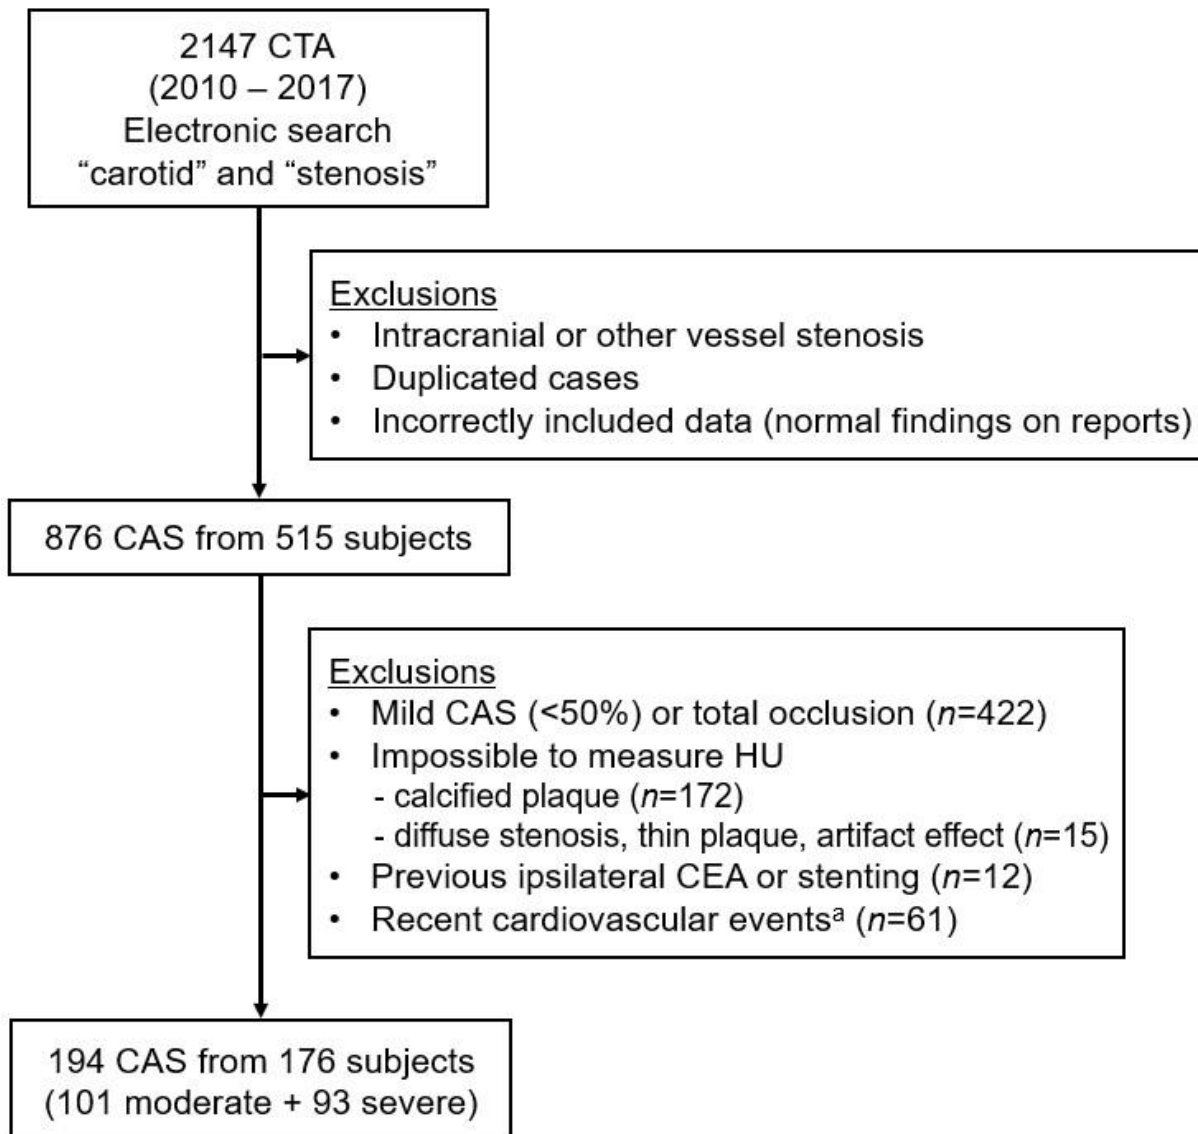

**Online Fig 2. Boxplot of the degree of CAS on baseline CTA and additional Doppler ultrasound imaging**

The distribution of the degree of CAS values revealed no significant difference between the non-MACE and MACE groups.

CAS, carotid artery stenosis; IQR, interquartile range; MACE, major adverse cardiovascular event

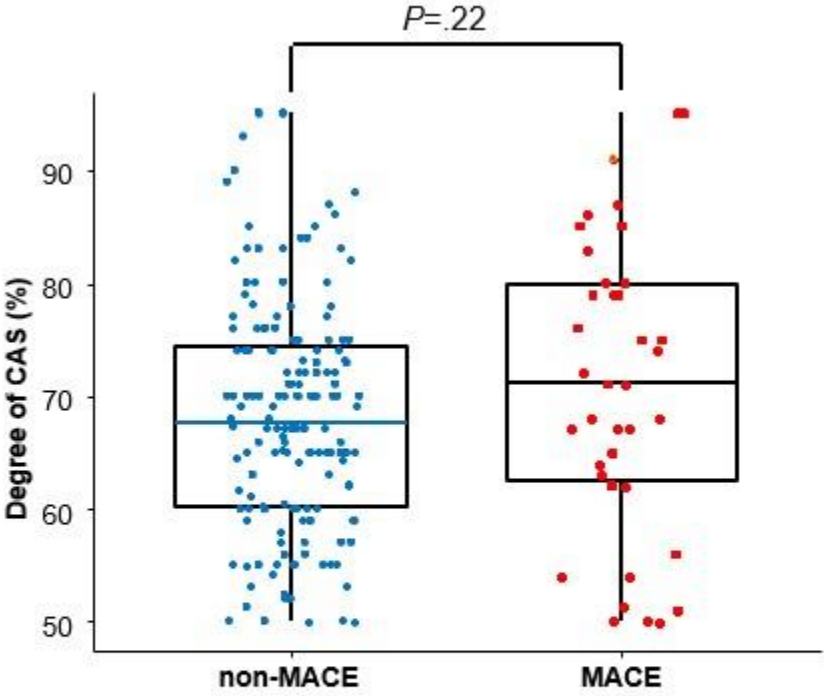

|                | Degree of CAS (%)<br>Median (IQR) |
|----------------|-----------------------------------|
| non-MACE group | 67.6 (62.0–74.8)                  |
| MACE group     | 71.0 (62.0–80.0)                  |
